# Supplementary material for: Coupled mesoscale–microscale modeling of air quality in a polluted city using WRF-LES-Chem
Source: Copernicus journal article supplement (doi:10.5194/acp-23-5905-2023), 2023-05-30
Supplement: Supplementary file 1 [file acp-23-5905-2023-supplement.pdf]

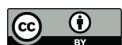

*Supplement of*

## **Coupled mesoscale–microscale modeling of air quality in a polluted city using WRF-LES-Chem**

**Yuting Wang et al.**

*Correspondence to:* Yuting Wang (yuting.wang@polyu.edu.hk) and Yong-Feng Ma (mayf3@sustech.edu.cn)

The copyright of individual parts of the supplement might differ from the article licence.

## 1 Diurnal profiles of road and point emissions.

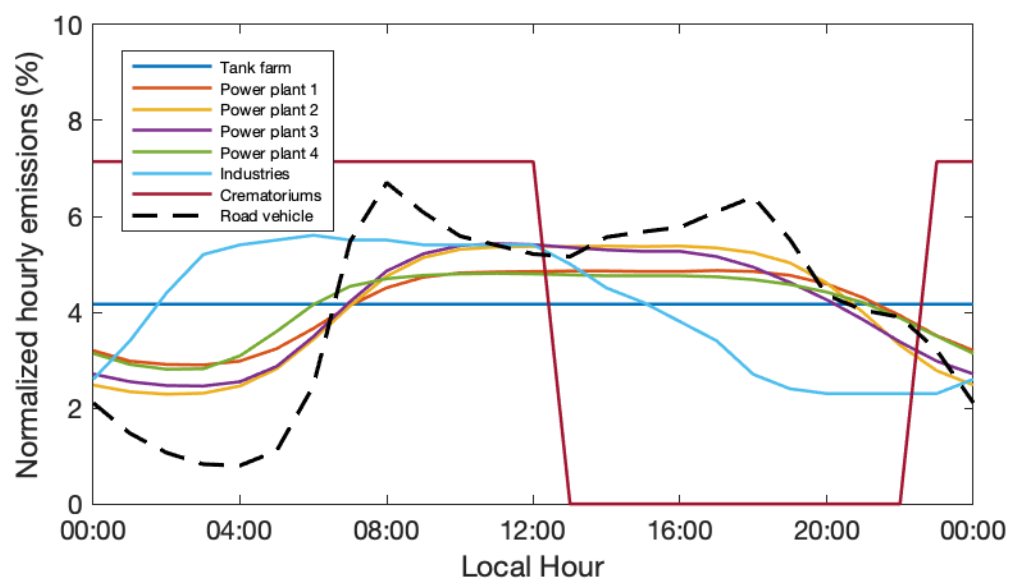

**Figure S1.** The diurnal profiles of the road and point emissions. Black dashed line represents the road emissions; colored solid lines represent various point emissions (power plants, industries, crematorium, and tank farms) with different diurnal variations.

## 2 Evaluation with HKO meteorological measurements.

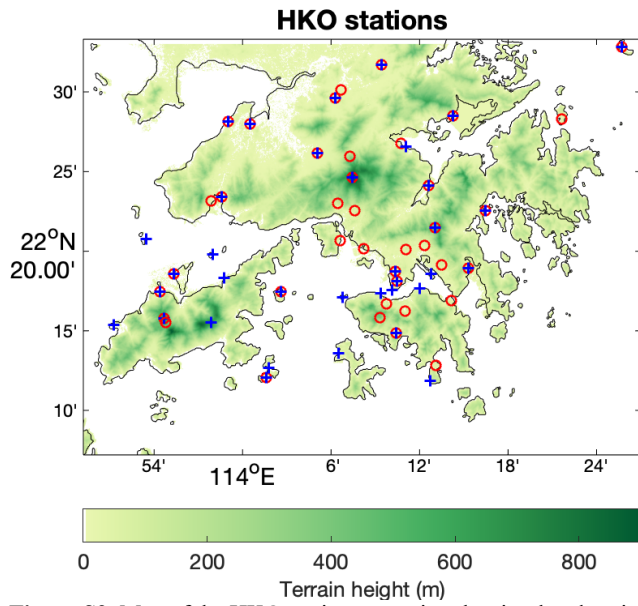

**Figure S2.** Map of the HKO stations covering the simulated period. Red circles are the sites with temperature observations; blue crosses are the sites with wind observations.

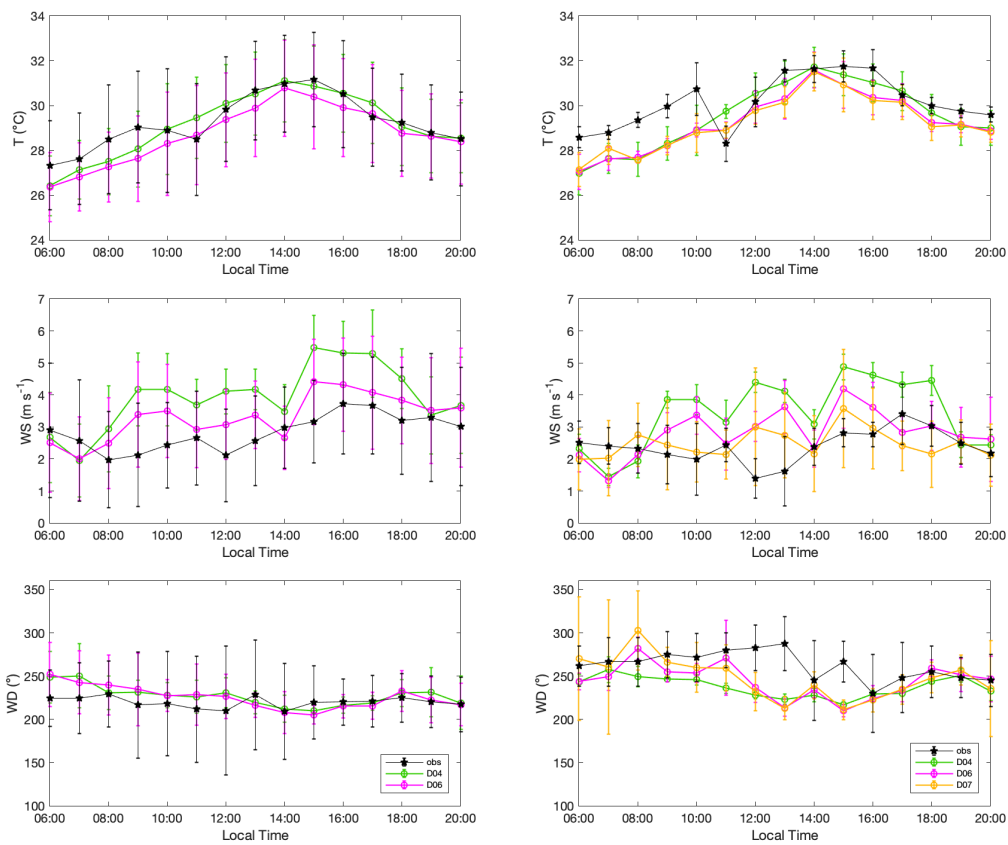

**Figure S3.** Time series of temperature (T), wind speed (WS), and wind direction (WD) averaged from stations covered by D06 (left) and D07 (right). The black pentagrams are the observations; the circles with different colors are the simulations with different resolutions (green: D04, 900 m; magenta: D06, 100 m; yellow: D07, 33.3 m). Error bars refer to the standard deviations.

### 3 Evaluation with ozone sounding observations in the boundary layer.

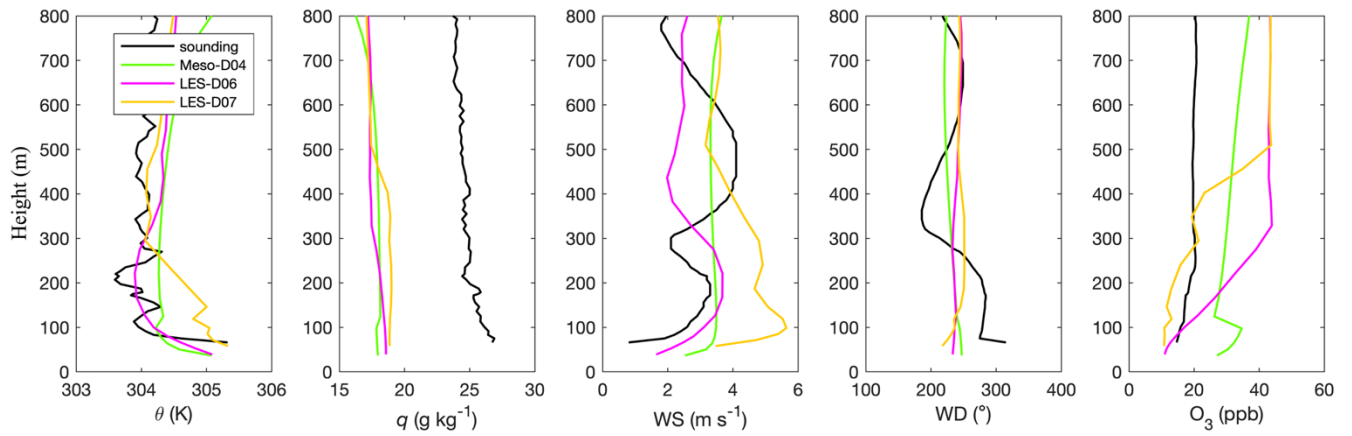

**Figure S4.** Comparison between ozone sounding measurements and model simulations in the boundary layer at 13:55 LT. The variables are the potential temperature ( $\theta$ ; a), the water vapor mixing ratio ( $q$ ; b), wind speed (WS; c), wind direction (WD; d), and ozone mixing ratio ( $O_3$ ; e). The black lines represent observations; the green lines the simulations from D04 with resolution of 900 m; the magenta lines the simulations from D06 with resolution of 100 m; and the yellow lines the simulations from D07 with resolution of 33.3 m.
